# Supplementary material
Source: PubMed Central journal article supplement (PMC5152695)
Supplement: NIHMS815207-supplement-01.pdf [file NIHMS815207-supplement-01.pdf]

## Supplementary Figure 1

|    | rPomc                  |                                              |       | hPOMC     |                        |                                             |
|----|------------------------|----------------------------------------------|-------|-----------|------------------------|---------------------------------------------|
|    | NeuroD1                | Tpit                                         | Pitx1 | (NeuroD1) | (Tpit)                 | (Pitx1)                                     |
| Wt | AAGGCAGATGGAC          | GCCTCACACCAGGATGCTAAGCCTCT                   |       | Wt        | CAGGCAGATGCCA          | CCCACACGGGGGTGCTAAGCCTCC                    |
| M1 | AAGGCAGATGGAC          | GCCTCAC <b>CAA</b> AGGATGCTAAGCCTCT          |       | M1        | CAGGCAGATGCCA          | CCC <b>ACAAA</b> GGGGGTGCTAAGCCTCC          |
| M2 | AAGGCAGATGGAC          | GCCTCACACCAGGATGCTA <b>CTA</b> CTCT          |       | M2        | CAGGCAGATGCCA          | CCCACACGGGGGTGCTA <b>CTA</b> CTCC           |
| M3 | AAGGCAGATGGAC          | GCCTCAC <b>CAA</b> AGGATGCTA <b>CTA</b> CTCT |       | M3        | CAGGCAGATGCCA          | CCC <b>ACAAA</b> GGGGGTGCTA <b>CTA</b> CTCC |
| M4 | AAG <b>GTTT</b> ATGGAC | GCCTCACACCAGGATGCTAAGCCTCT                   |       | M4        | CAG <b>GTTT</b> ATGCCA | CCCACACGGGGGTGCTAAGCCTCC                    |

**Supplementary Figure 1.** Sequences of the *rPomc* promoter (−480/+63) (left) and *hPOMC* promoter (−428/+68) (right); mutant sequences are indicated in bold.
