# Supplementary material
Source: PubMed Central journal article supplement (PMC5152695)
Supplement: NIHMS815207-supplement-02.pdf [file NIHMS815207-supplement-02.pdf]

## Supplementary Figure 2

### Cell Viability

| <b><u>R-roscovitine</u></b> | <b>0</b> | <b>20</b> | <b>50 (<math>\mu</math>M)</b> |
|-----------------------------|----------|-----------|-------------------------------|
| DMS79 (%)                   | 100      | 83.61     | 74.52                         |
| COLO320 (%)                 | 100      | 97.3      | 50.47                         |
| Cs#1 (%)                    | 100      | 90.08     | —                             |
|                             |          |           |                               |
| <b><u>HLM006474</u></b>     | <b>0</b> | <b>25</b> | <b>50 (<math>\mu</math>M)</b> |
| DMS79 (%)                   | 100      | 70.89     | 74.47                         |
| <b><u>HLM006474</u></b>     | <b>0</b> | <b>20</b> | <b>40 (<math>\mu</math>M)</b> |
| Cs#1 (%)                    | 100      | 61.5      | 48.69                         |

**Supplementary Figure 2.** Cell viabilities of DMS79 cells, COLO320 cells, and pituitary Cushing's tumors (Cs#1) treated with R-roscovitine and HLM006474 for 48 hours at the indicated concentrations.
