# Supplementary material
Source: PubMed Central journal article supplement (PMC5152695)
Supplement: NIHMS815207-supplement-03.pdf [file NIHMS815207-supplement-03.pdf]

### Supplementary Figure 3

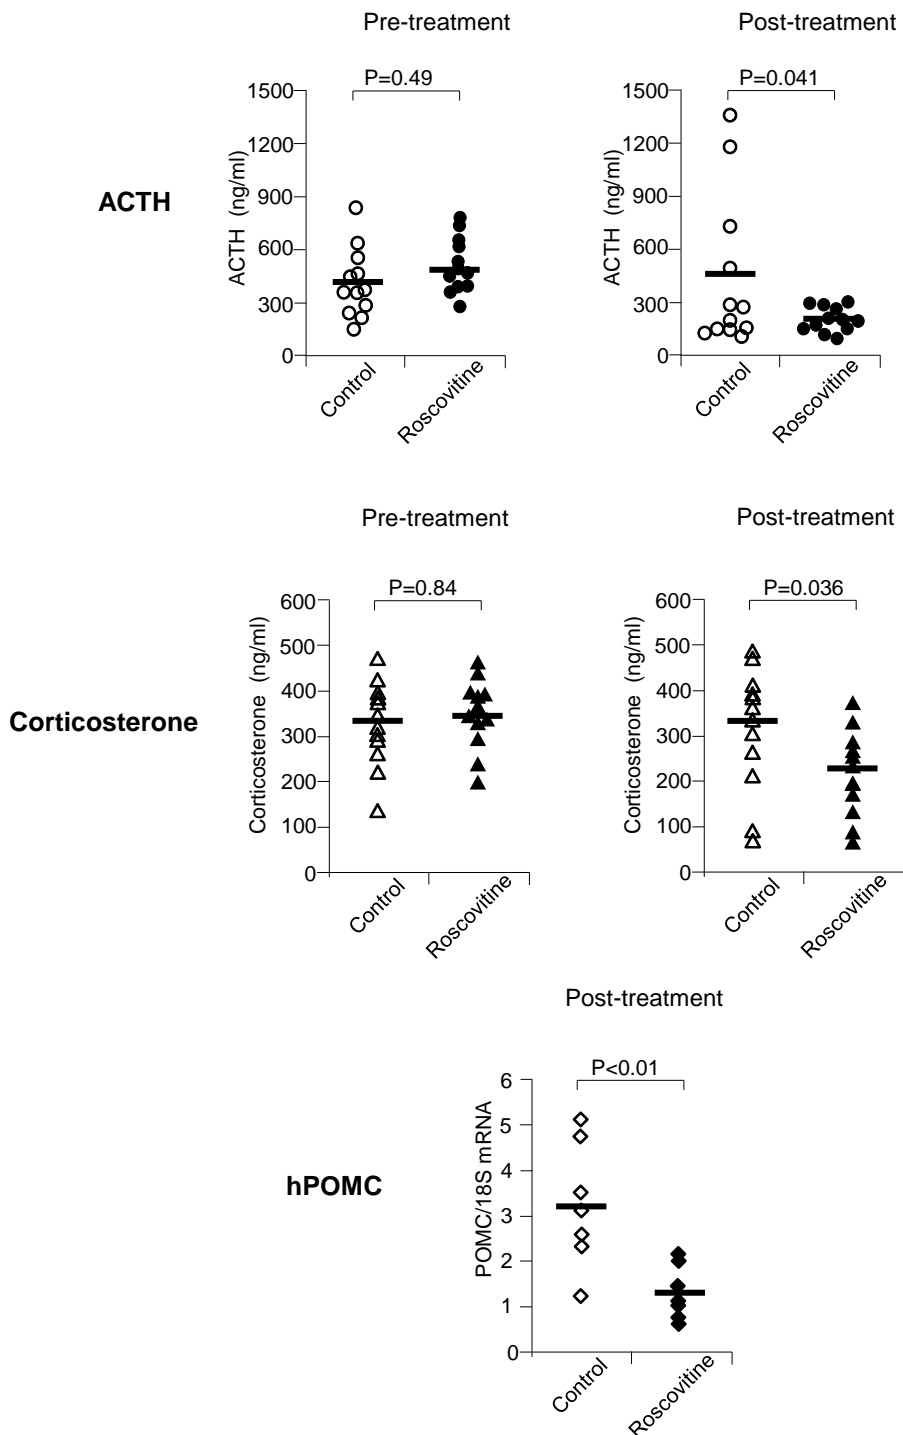

**Supplementary Figure 3.** Seven days after subcutaneous DMS79 injection into 24 immunodeficient male mice, R-roscovitine was administered by oral gavage (twice/day for 17 days). Tumor extracted hPOMC mRNA ( $P < 0.01$ ), plasma ACTH (pre Tx  $P=0.49$ , post Tx  $P = 0.041$ ), and plasma corticosterone (pre Tx  $P = 0.84$ , post Tx  $P = 0.036$ ) were suppressed compared to untreated age- and weight-matched control mice.
