# Supplementary material
Source: PubMed Central journal article supplement (PMC5152695)
Supplement: NIHMS815207-supplement-04.pdf [file NIHMS815207-supplement-04.pdf]

## Supplementary Figure 4

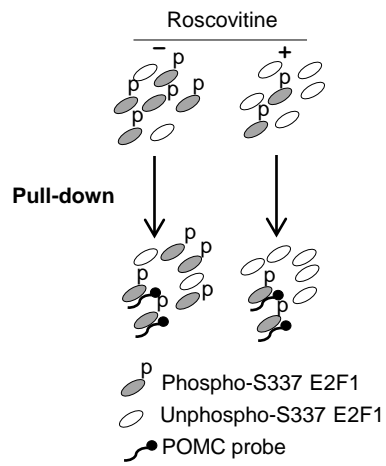

**Supplementary Figure 4.** Schematic drawing of experimental design of DNA pull down assay.
