# Supplementary material
Source: PubMed Central journal article supplement (PMC5152695)
Supplement: NIHMS815207-supplement-05.pdf [file NIHMS815207-supplement-05.pdf]

## Supplementary Figure 5

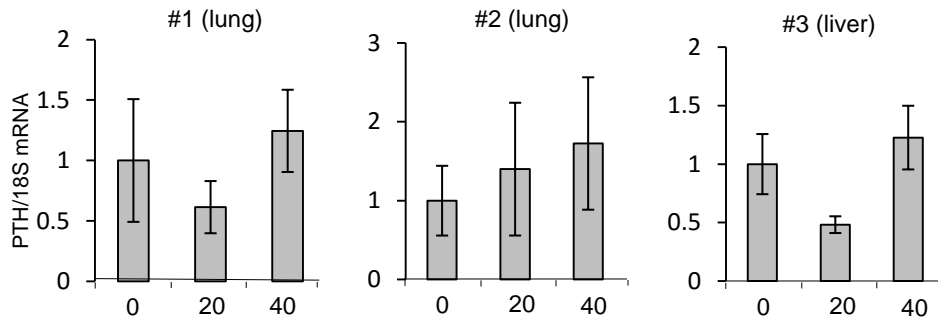

**Supplementary Figure 5.** Primary cultures derived from non-pituitary POMC expressing tumors (#1-3) treated with HLM006474. hPTH mRNA levels were analyzed by RT-PCR and normalized with 18S rRNA.
